# Supplementary material
Source: PubMed Central journal article supplement (PMC8114450)
Supplement: sj-pdf-1-acb-10.1177_0004563220984827.pdf [file sj-pdf-1-acb-10.1177_0004563220984827.pdf]

Table S1: Antibody test results of 12 patients

Quantitative antibody test (iFLASH)

IgM

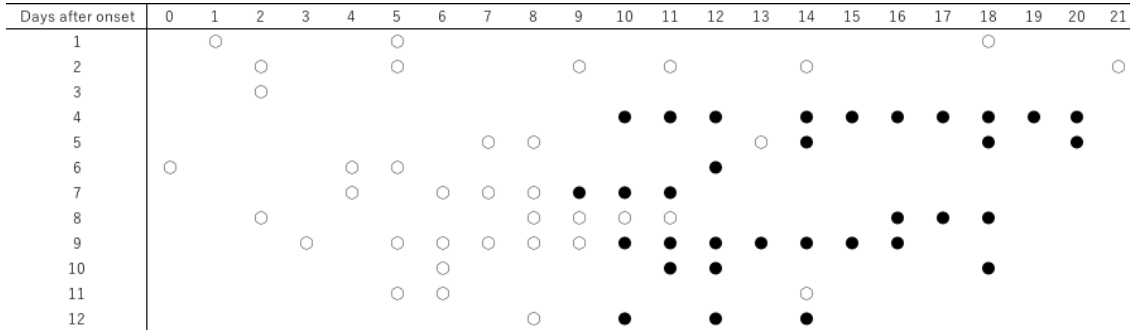

IgG

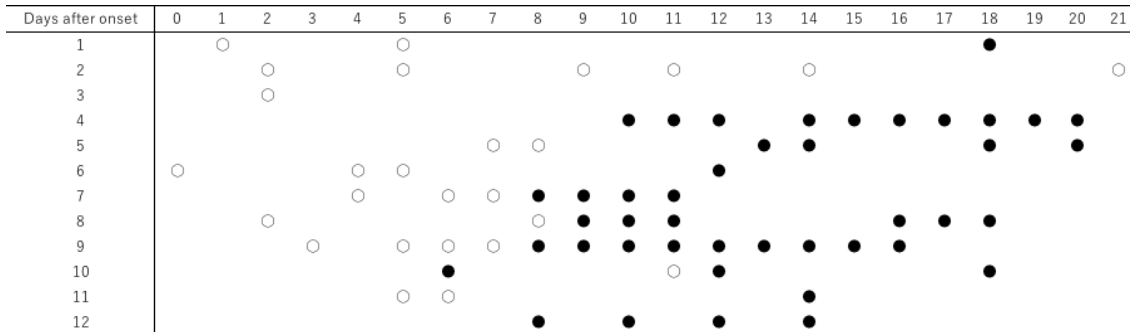

●-positive test, ○-negative test

ALL test

IgM

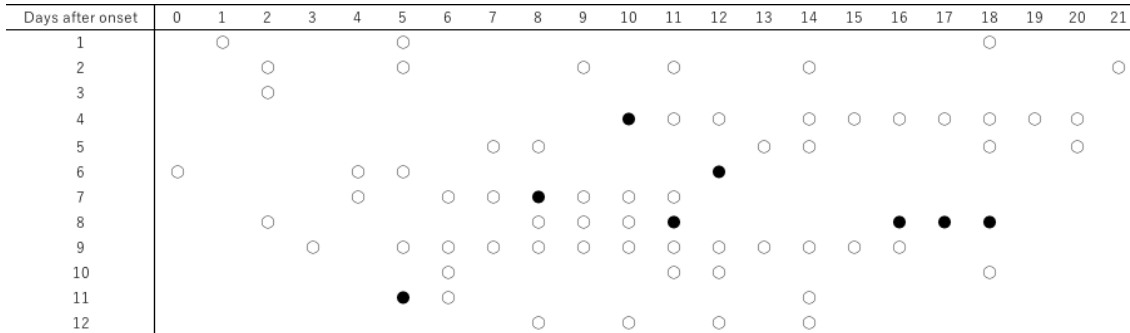

IgG

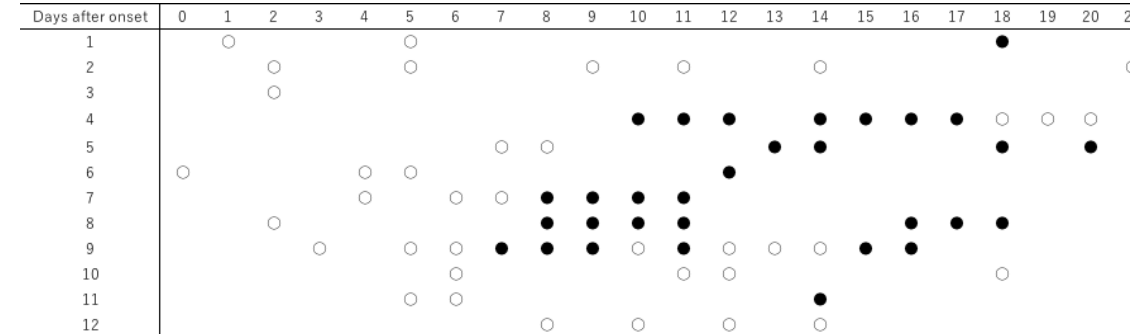

●-positive test, ○-negative test

SD Biosensor

IgM

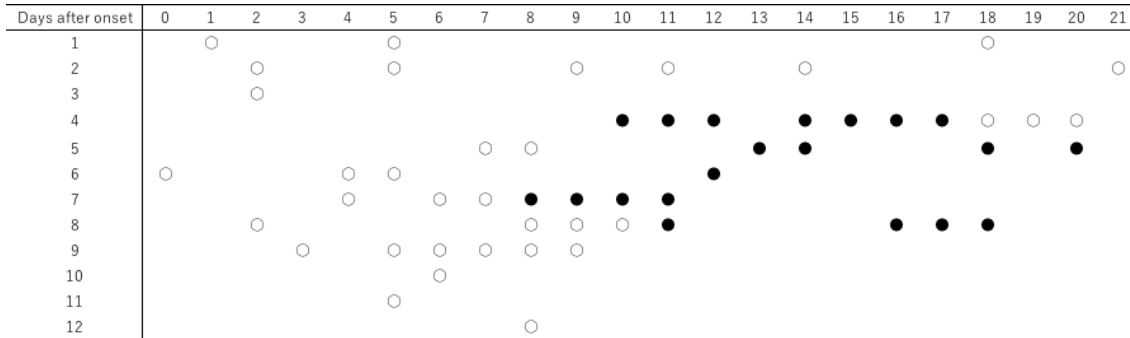

IgG

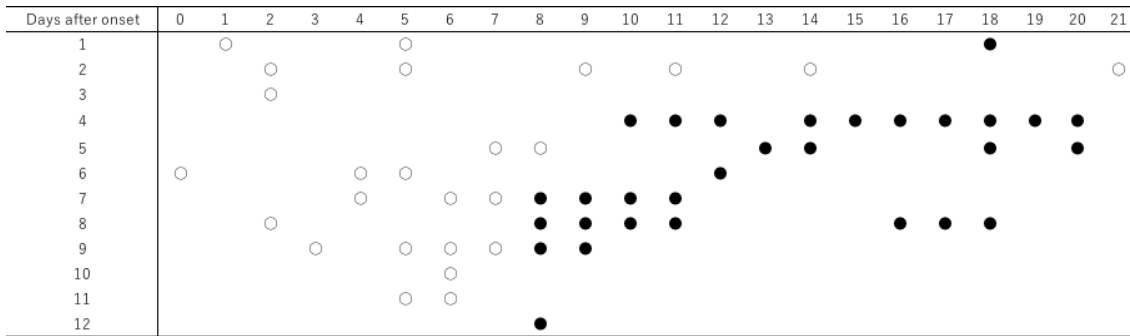

●-positive test, ○-negative test

KURABO

IgM

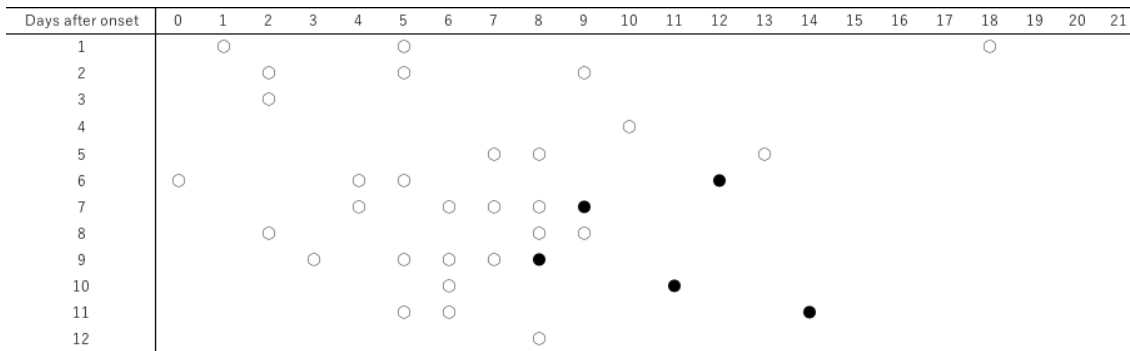

IgG

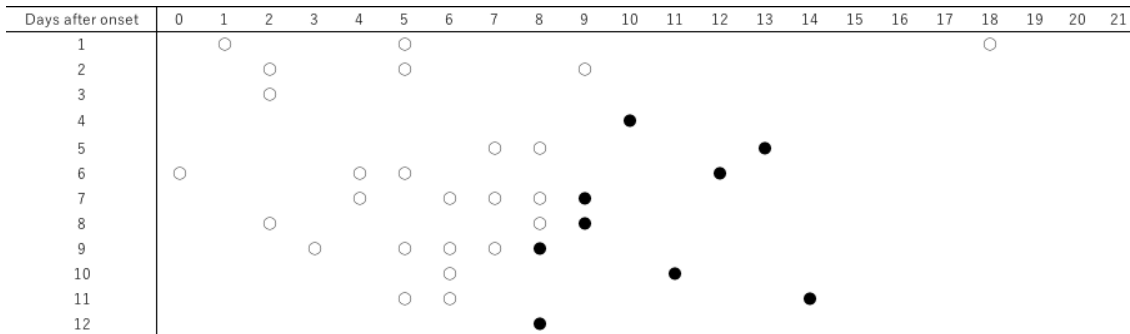

●-positive test, ○-negative test
