# Supplementary material
Source: PubMed Central journal article supplement (PMC8114450)
Supplement: sj-pdf-2-acb-10.1177_0004563220984827.pdf [file sj-pdf-2-acb-10.1177_0004563220984827.pdf]

Table S2: Antibody titers measured by iFLASH and COVID-19 severity during the clinical course.

iFLASH IgM

|    | Age | Gender | Severity* | 0    | 1    | 2    | 3    | 4    | 5    | 6    | 7    | 8    | 9     | 10    | 11    | 12    | 13    | 14    | 15    | 16    | 17    | 18    | 19    | 20    | 21   |
|----|-----|--------|-----------|------|------|------|------|------|------|------|------|------|-------|-------|-------|-------|-------|-------|-------|-------|-------|-------|-------|-------|------|
| 1  | 20s | F      | mild      |      | 0.86 |      |      |      | 0.81 |      |      |      |       |       |       |       |       |       |       |       |       | 1.27  |       |       |      |
| 2  | 60s | M      | mild      |      |      | 0.86 |      |      | 0.81 |      |      |      | 0.82  |       | 0.87  |       | 0.78  |       |       |       |       |       |       |       | 0.97 |
| 3  | 20s | F      | mild      |      |      | 0.78 |      |      |      |      |      |      |       |       |       |       |       |       |       |       |       |       |       |       |      |
| 4  | 60s | M      | severe    |      |      |      |      |      |      |      |      |      |       | 13.75 | 31.16 | 31.87 |       | 23.6  | 18.38 | 16.63 | 14.41 | 13.22 | 12.21 | 11.09 |      |
| 5  | 60s | F      | moderate  |      |      |      |      |      |      |      | 0.18 | 0.19 |       |       |       |       | 2.36  | 12.47 |       |       |       | 24.6  |       | 32.16 |      |
| 6  | 80s | M      | severe    | 0.64 |      |      |      | 1.12 | 1.75 |      |      |      |       |       |       | 73.76 |       |       |       |       |       |       |       |       |      |
| 7  | 70s | M      | severe    |      |      |      |      | 0.26 |      | 0.37 | 0.81 | 2.73 | 12.22 | 22.49 | 28.12 |       |       |       |       |       |       |       |       |       |      |
| 8  | 70s | M      | severe    |      |      | 0.32 |      |      |      |      |      | 0.43 | 0.63  | 0.96  | 2.13  |       |       |       |       | 40.45 | 42.13 | 39.92 |       |       |      |
| 9  | 60s | M      | severe    |      |      |      | 0.44 |      | 0.37 | 0.37 | 0.45 | 1.2  | 8.65  | 13.83 | 14.46 | 22.22 | 20.05 | 16.24 | 35.51 | 34.09 |       |       |       |       |      |
| 10 | 60s | M      | severe    |      |      |      |      |      |      |      |      |      |       |       | 14.22 | 23.37 |       |       |       |       |       |       | 24.98 |       |      |
| 11 | 80s | M      | severe    |      |      |      |      |      | 0.84 | 0.81 |      |      |       |       |       |       |       | 9.33  |       |       |       |       |       |       |      |
| 12 | 40s | M      | moderate  |      |      |      |      |      |      |      |      | 9.18 |       | 15.9  |       | 19.46 |       | 18.64 |       |       |       |       |       |       |      |

iFLASH IgG

|    | Age | Gender | Severity* | 0    | 1    | 2    | 3    | 4    | 5    | 6     | 7    | 8     | 9     | 10    | 11    | 12    | 13    | 14     | 15    | 16    | 17    | 18    | 19    | 20    | 21    |
|----|-----|--------|-----------|------|------|------|------|------|------|-------|------|-------|-------|-------|-------|-------|-------|--------|-------|-------|-------|-------|-------|-------|-------|
| 1  | 20s | F      | mild      |      | 0.64 |      |      |      | 0.65 |       |      |       |       |       |       |       |       |        |       |       |       |       | 28.35 |       |       |
| 2  | 60s | M      | mild      |      |      | 0.41 |      |      | 0.4  |       |      |       | 0.39  |       | 0.37  |       | 0.35  |        |       |       |       |       |       |       | 0.41  |
| 3  | 20s | F      | mild      |      |      | 4.88 |      |      |      |       |      |       |       |       |       |       |       |        |       |       |       |       |       |       |       |
| 4  | 60s | M      | severe    |      |      |      |      |      |      |       |      |       |       | 57.17 | 93.53 | 97.64 |       | 117.32 | 83.98 | 98.37 | 89.34 | 94.12 | 80.29 | 63.53 |       |
| 5  | 60s | F      | moderate  |      |      |      |      |      |      |       | 0.78 | 0.75  |       |       |       |       | 23.34 | 86.06  |       |       |       |       | 90.56 |       | 69.62 |
| 6  | 80s | M      | severe    | 0.86 |      |      |      | 0.74 | 0.86 |       |      |       |       |       |       | 57.84 |       |        |       |       |       |       |       |       |       |
| 7  | 70s | M      | severe    |      |      |      |      | 0.68 |      | 0.94  | 4.58 | 23.42 | 62.79 | 75.52 | 57.07 |       |       |        |       |       |       |       |       |       |       |
| 8  | 70s | M      | severe    |      |      | 0.89 |      |      |      |       |      | 7.97  | 19.07 | 35.78 | 51.97 |       |       |        |       | 70.73 | 76.29 | 68.76 |       |       |       |
| 9  | 60s | M      | severe    |      |      |      | 1.31 |      | 0.89 | 1.51  | 3.18 | 21.03 | 48.19 | 51.3  | 42.89 | 42.55 | 44.57 | 45.67  | 42.81 | 46.94 |       |       |       |       |       |
| 10 | 60s | M      | severe    |      |      |      |      |      |      | 10.66 |      |       |       |       | 7.15  | 51.6  |       |        |       |       |       |       | 62.07 |       |       |
| 11 | 80s | M      | severe    |      |      |      |      |      | 2.89 | 2.41  |      |       |       |       |       |       |       | 67.95  |       |       |       |       |       |       |       |
| 12 | 40s | M      | moderate  |      |      |      |      |      |      |       |      | 44.74 |       | 49.49 |       | 51.61 |       | 61.91  |       |       |       |       |       |       |       |

\*The maximum severity during clinical course is shown. Definition of severity is as follows: "mild" for symptomatic patients without hypoxia, "moderate" for symptomatic patients with hypoxia requiring oxygen inhalation, and "severe" for symptomatic patients with hypoxia requiring mechanical ventilation
